# Supplementary material
Source: MDPI journal article supplement (https://www.mdpi.com/2075-163X/10/9/757)
Supplement: s1 [file s1]

# STRATIGRAPHY

| BOREHOLE E-AH1 |              |           |           |      |      |        |        |              |            |        |            |             |                                                                                                                                                                                                                              |                                                                                                                                                                         |
|----------------|--------------|-----------|-----------|------|------|--------|--------|--------------|------------|--------|------------|-------------|------------------------------------------------------------------------------------------------------------------------------------------------------------------------------------------------------------------------------|-------------------------------------------------------------------------------------------------------------------------------------------------------------------------|
| CORE NO        | HORIZON      | DEPTH (m) | LITHOLOGY |      |      |        |        |              | PHOTOGRAPH | CYCLES | STRUCTURES | FACIES CODE | LITHOLOGICAL DESCRIPTION                                                                                                                                                                                                     |                                                                                                                                                                         |
|                |              |           | MUD       |      | SAND |        |        |              |            |        |            |             |                                                                                                                                                                                                                              |                                                                                                                                                                         |
|                |              |           | CLAY      | SILT | FINE | MEDIUM | COARSE | CONGLOMERATE |            |        |            |             |                                                                                                                                                                                                                              |                                                                                                                                                                         |
| 1              | F-E<br>13At1 | 2471      |           |      |      |        |        |              |            |        |            | Smg         | Fine grained and massive glauconitic sandstone with yellowish-brown staining. Shell fragments are present in the sandstone                                                                                                   |                                                                                                                                                                         |
|                |              | 2473      |           |      |      |        |        |              |            |        |            |             |                                                                                                                                                                                                                              |                                                                                                                                                                         |
|                |              | 2475      |           |      |      |        |        |              |            |        | Smg        |             |                                                                                                                                                                                                                              |                                                                                                                                                                         |
|                |              | 2477      |           |      |      |        |        |              |            |        |            |             |                                                                                                                                                                                                                              |                                                                                                                                                                         |
|                |              | 2479      |           |      |      |        |        |              |            |        |            | F1<br>Smg   | Dark grey, laminated to thin bedded black shale interbedded with medium grained glauconitic sandstone. The shale is characterized by near horizontal bedding and the contacts between the shale and sandstone are erosional. |                                                                                                                                                                         |
|                |              | 2481      |           |      |      |        |        |              |            |        |            |             |                                                                                                                                                                                                                              |                                                                                                                                                                         |
|                |              | 2483      |           |      |      |        |        |              |            |        |            |             | Smg                                                                                                                                                                                                                          | Fine grained massive glauconitic sandstone with yellowish-brown staining, shale clast and high angular bedding. There are sediment injection features in the sandstone. |
|                |              | 2485      |           |      |      |        |        |              |            |        |            |             |                                                                                                                                                                                                                              |                                                                                                                                                                         |

|  |                          |  |                          |  |                         |  |                 |  |                        |
|--|--------------------------|--|--------------------------|--|-------------------------|--|-----------------|--|------------------------|
|  | Disc structure           |  | Horizontal lamination    |  | Horizontal bedding      |  | Massive bedding |  | Clast imbrication      |
|  | Shell fragment           |  | Stylolite                |  | Ripple cross lamination |  | Cross bedding   |  | Flaser bedding         |
|  | Rip-up clast             |  | Mudstone                 |  | Shale                   |  | Siltstone       |  | Fine grained sandstone |
|  | Medium grained sandstone |  | Coarse grained sandstone |  | Conglomerate            |  | Gravel          |  | Clay                   |

| BOREHOLE E-AJ1 |         |           |           |      |      |        |        |              |                                                                                     |                                                                                     |            |             |                                                                                                                                                        |
|----------------|---------|-----------|-----------|------|------|--------|--------|--------------|-------------------------------------------------------------------------------------|-------------------------------------------------------------------------------------|------------|-------------|--------------------------------------------------------------------------------------------------------------------------------------------------------|
| CORE NO        | HORIZON | DEPTH (m) | LITHOLOGY |      |      |        |        |              | PHOTOGRAPH                                                                          | CYCLOTHERM                                                                          | STRUCTURES | FACIES CODE | LITHOLOGICAL DESCRIPTION                                                                                                                               |
|                |         |           | MUD       |      | SAND |        |        | CONGLOMERATE |                                                                                     |                                                                                     |            |             |                                                                                                                                                        |
|                |         |           | CLAY      | SILT | FINE | MEDIUM | COARSE |              |                                                                                     |                                                                                     |            |             |                                                                                                                                                        |
|                | 1       | 2701      |           |      |      |        |        |              | 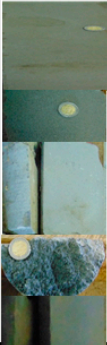   |    | Smg        |             | Light to dark grey, fine to medium grained massive sandstone. The sandstones are blocky to crumbly, dolomitic in some places and slightly glauconitic. |
|                |         | 2703      |           |      |      |        |        |              |                                                                                     |                                                                                     |            |             |                                                                                                                                                        |
|                |         | 2705      |           |      |      |        |        |              |                                                                                     |                                                                                     |            |             |                                                                                                                                                        |
|                |         |           |           |      |      |        |        |              |                                                                                     |                                                                                     |            |             |                                                                                                                                                        |
|                | 2       | 2720      |           |      |      |        |        |              |  |  | Smg        |             | Light to dark grey, fine to medium grained massive sandstone. The sandstones are blocky to crumbly, dolomitic in some places and slightly glauconitic. |
|                |         | 2722      |           |      |      |        |        |              |                                                                                     |                                                                                     |            |             |                                                                                                                                                        |
|                |         | 2724      |           |      |      |        |        |              |                                                                                     |                                                                                     |            |             |                                                                                                                                                        |
|                |         | 2726      |           |      |      |        |        |              |                                                                                     |                                                                                     |            |             |                                                                                                                                                        |
|                |         | 2728      |           |      |      |        |        |              |                                                                                     |                                                                                     |            |             |                                                                                                                                                        |
|                |         | 2730      |           |      |      |        |        |              |                                                                                     |                                                                                     |            |             |                                                                                                                                                        |

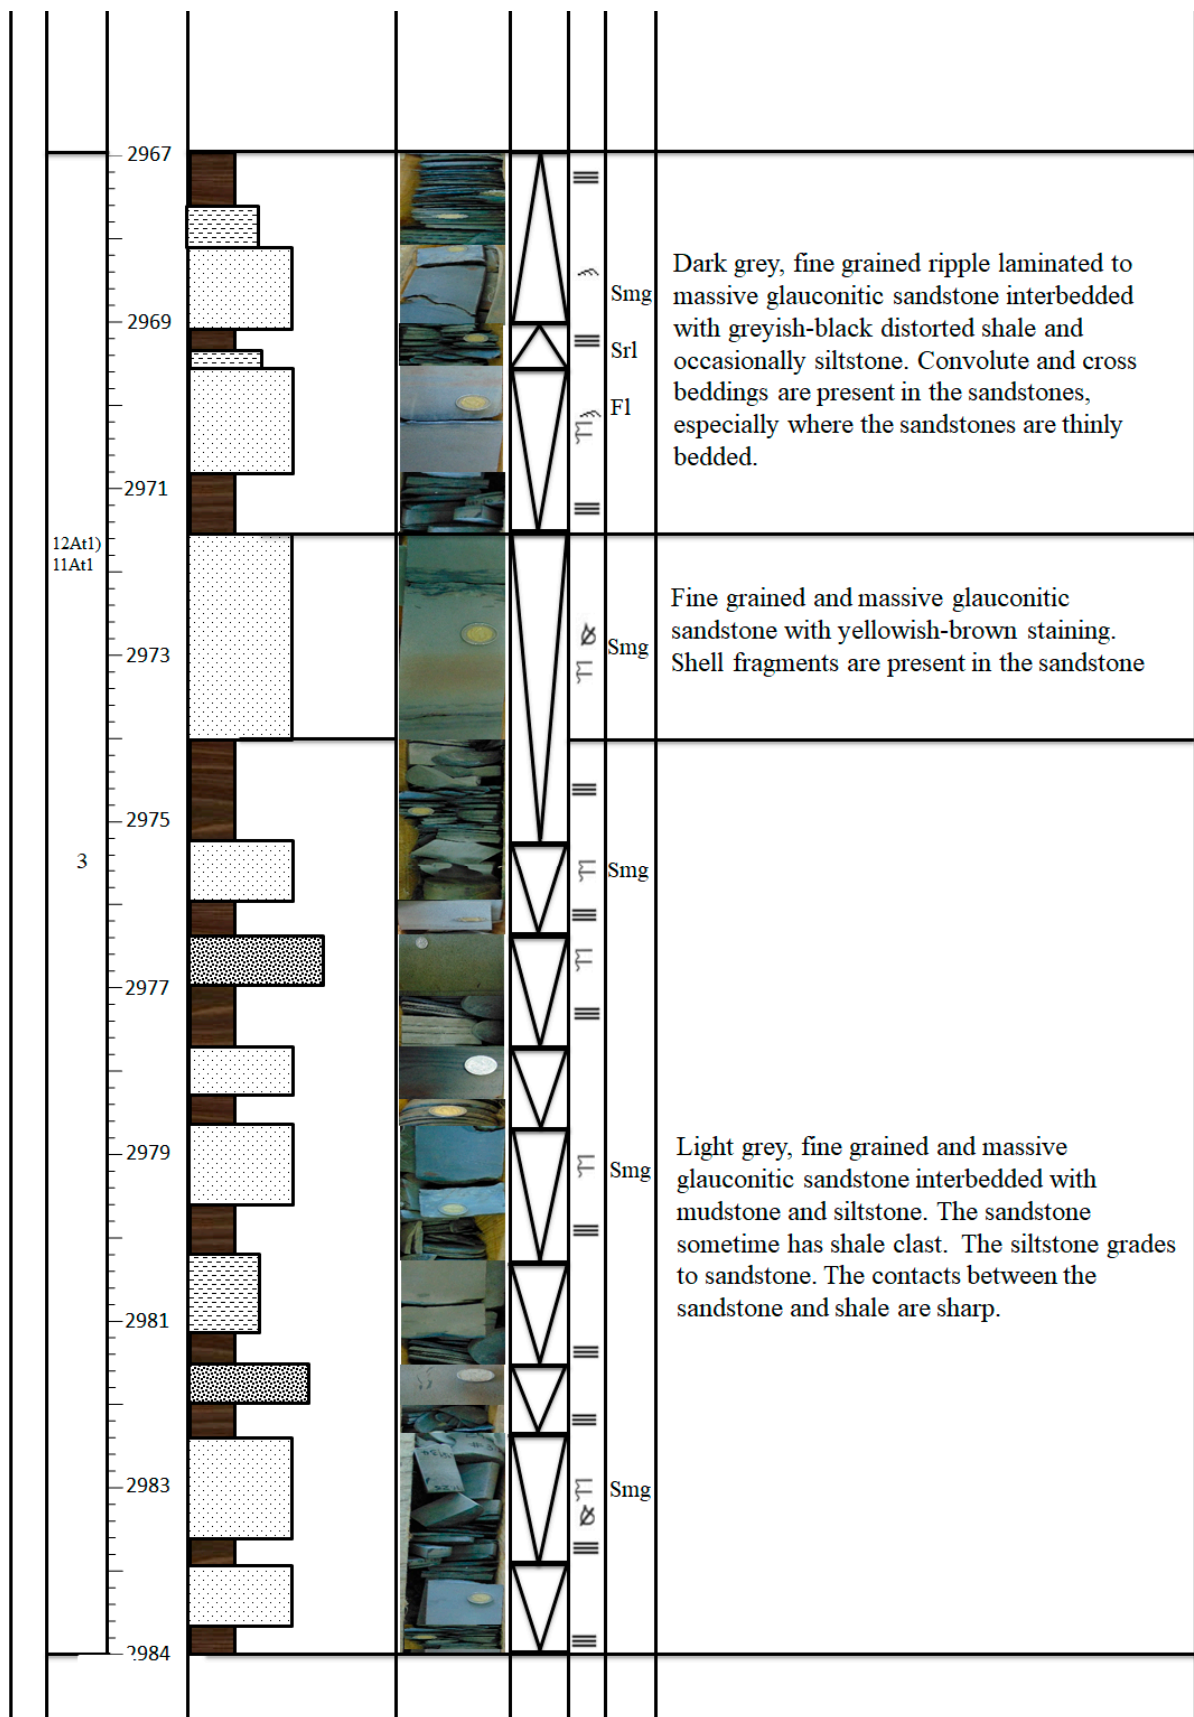

Dark grey, fine grained ripple laminated to massive glauconitic sandstone interbedded with greyish-black distorted shale and occasionally siltstone. Convolute and cross beddings are present in the sandstones, especially where the sandstones are thinly bedded.

Fine grained and massive glauconitic sandstone with yellowish-brown staining. Shell fragments are present in the sandstone

Light grey, fine grained and massive glauconitic sandstone interbedded with mudstone and siltstone. The sandstone sometime has shale clast. The siltstone grades to sandstone. The contacts between the sandstone and shale are sharp.

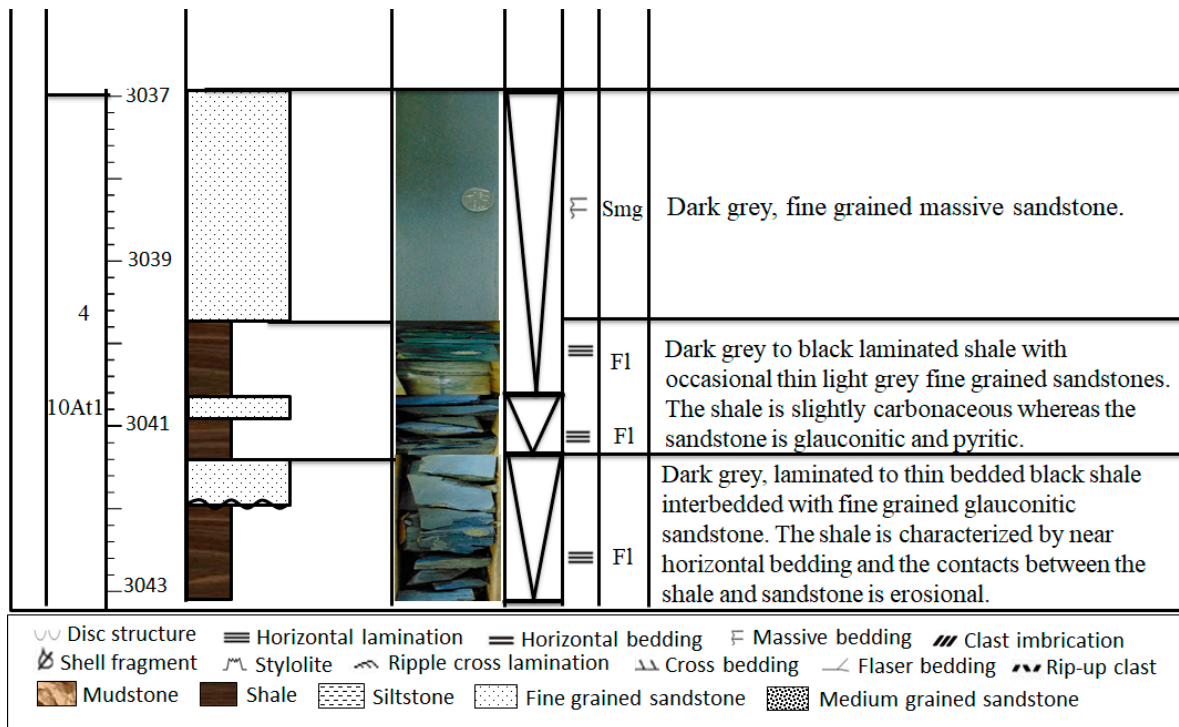

| BOREHOLE E-BA1 |         |           |           |      |      |        |        |              |            |        |            |             |                                                                                                                                                                                                                                  |                                                                                                                                                                                  |
|----------------|---------|-----------|-----------|------|------|--------|--------|--------------|------------|--------|------------|-------------|----------------------------------------------------------------------------------------------------------------------------------------------------------------------------------------------------------------------------------|----------------------------------------------------------------------------------------------------------------------------------------------------------------------------------|
| CORE NO        | HORIZON | DEPTH (m) | LITHOLOGY |      |      |        |        |              | PHOTOGRAPH | CYCLES | STRUCTURES | FACIES CODE | LITHOLOGICAL DESCRIPTION                                                                                                                                                                                                         |                                                                                                                                                                                  |
|                |         |           | MUD       |      | SAND |        |        | CONGLOMERATE |            |        |            |             |                                                                                                                                                                                                                                  |                                                                                                                                                                                  |
|                |         |           | CLAY      | SILT | FINE | MEDIUM | COARSE |              |            |        |            |             |                                                                                                                                                                                                                                  |                                                                                                                                                                                  |
| 1              |         | 2828      |           |      |      |        |        |              |            |        |            | Smg         | Light to dark grey, fine to medium grained massive glauconitic sandstone interbedded with black carbonaceous mudstone.                                                                                                           |                                                                                                                                                                                  |
|                |         |           |           |      |      |        |        |              |            |        |            | Fc          |                                                                                                                                                                                                                                  |                                                                                                                                                                                  |
|                |         |           |           |      |      |        |        |              |            |        |            |             | F1                                                                                                                                                                                                                               | Light brownish grey laminated clay-rich siltstones. It is slightly carbonaceous and sandy in places and also glauconitic.                                                        |
|                |         | 2830      |           |      |      |        |        |              |            |        |            |             | Fc                                                                                                                                                                                                                               | Dark grey to black laminated shale with occasional thin light grey fine grained sandstones. The shale is slightly carbonaceous whereas the sandstone is glauconitic and pyritic. |
|                |         |           |           |      |      |        |        |              |            |        |            |             | Fc                                                                                                                                                                                                                               |                                                                                                                                                                                  |
|                |         |           |           |      |      |        |        |              |            |        |            |             |                                                                                                                                                                                                                                  | Light grey, medium grained glauconitic sandstone.                                                                                                                                |
|                |         | 2832      |           |      |      |        |        |              |            |        |            |             | Fc                                                                                                                                                                                                                               | Dark grey to black, laminated slightly carbonaceous shale.                                                                                                                       |
|                |         |           |           |      |      |        |        |              |            |        |            |             |                                                                                                                                                                                                                                  |                                                                                                                                                                                  |
|                |         | 2834      |           |      |      |        |        |              |            |        |            |             | Smg                                                                                                                                                                                                                              |                                                                                                                                                                                  |
|                |         |           |           |      |      |        |        |              |            |        |            |             |                                                                                                                                                                                                                                  |                                                                                                                                                                                  |
| 2836           |         |           |           |      |      |        |        |              |            |        |            |             |                                                                                                                                                                                                                                  |                                                                                                                                                                                  |
| 2              | 13Atl   |           |           |      |      |        |        |              |            |        |            | Smg         | Light to dark grey, fine to medium grained massive sandstone. The sandstones are blocky to crumbly, dolomitic in some places and slightly glauconitic.                                                                           |                                                                                                                                                                                  |
|                |         | 2838      |           |      |      |        |        |              |            |        |            | Smg         |                                                                                                                                                                                                                                  |                                                                                                                                                                                  |
|                |         |           |           |      |      |        |        |              |            |        |            |             |                                                                                                                                                                                                                                  |                                                                                                                                                                                  |
|                |         | 2840      |           |      |      |        |        |              |            |        |            | Smg         |                                                                                                                                                                                                                                  |                                                                                                                                                                                  |
|                |         |           |           |      |      |        |        |              |            |        |            |             | Smg                                                                                                                                                                                                                              |                                                                                                                                                                                  |
|                |         | 2842      |           |      |      |        |        |              |            |        |            |             | Smg                                                                                                                                                                                                                              |                                                                                                                                                                                  |
|                |         | 2844      |           |      |      |        |        |              |            |        |            |             | The conglomerate is predominantly matrix supported and exhibits fining upward sequence. The clasts are claystone and siltstone. The matrix is a light brownish grey fine to medium grained sandstone. Occasional shell fragments |                                                                                                                                                                                  |
|                |         | 2846      |           |      |      |        |        |              |            |        |            | Gmm         |                                                                                                                                                                                                                                  |                                                                                                                                                                                  |

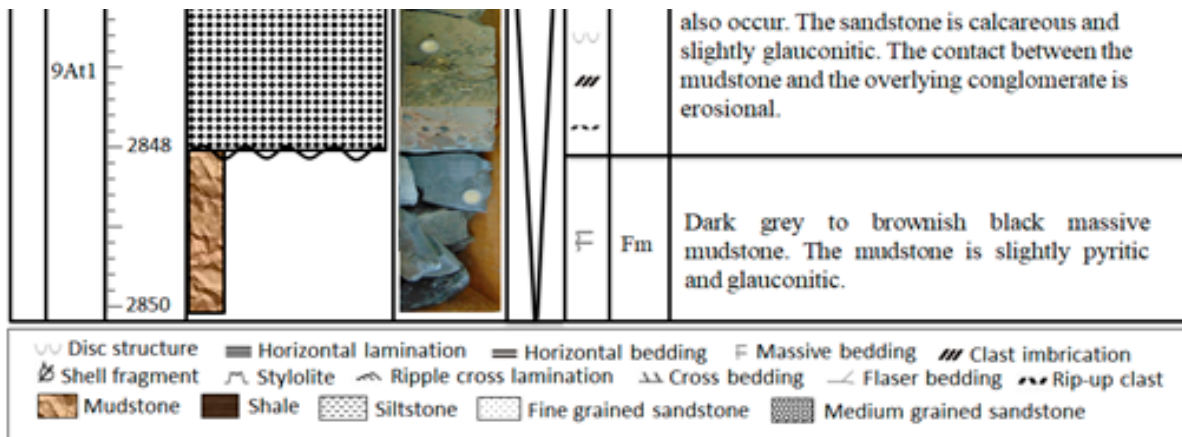



| BOREHOLE E-BB1 |         |           |                                                          |                                                                                                                                                                                |      |        |                                                                                                         |            |        |                                                                                                                                                                                                                                                                            |                                                                                                                                                               |                          |
|----------------|---------|-----------|----------------------------------------------------------|--------------------------------------------------------------------------------------------------------------------------------------------------------------------------------|------|--------|---------------------------------------------------------------------------------------------------------|------------|--------|----------------------------------------------------------------------------------------------------------------------------------------------------------------------------------------------------------------------------------------------------------------------------|---------------------------------------------------------------------------------------------------------------------------------------------------------------|--------------------------|
| CORE NO        | HORIZON | DEPTH (m) | LITHOLOGY                                                |                                                                                                                                                                                |      |        |                                                                                                         | PHOTOGRAPH | CYCLES | STRUCTURES                                                                                                                                                                                                                                                                 | FACIES CODE                                                                                                                                                   | LITHOLOGICAL DESCRIPTION |
|                |         |           | MUD                                                      |                                                                                                                                                                                | SAND |        |                                                                                                         |            |        |                                                                                                                                                                                                                                                                            |                                                                                                                                                               |                          |
|                |         |           | CLAY                                                     | SILT                                                                                                                                                                           | FINE | MEDIUM | COARSE                                                                                                  |            |        |                                                                                                                                                                                                                                                                            |                                                                                                                                                               |                          |
| 1              | 14A     | 2537      |                                                          |                                                                                                                                                                                |      |        |                                                                                                         |            |        | Smg                                                                                                                                                                                                                                                                        | Light grey, fine grained and massive glauconitic sandstone. The sandstone is mostly structureless. Shell fragments are occasionally present in the sandstone. |                          |
|                |         | Smg       |                                                          |                                                                                                                                                                                |      |        |                                                                                                         |            |        | Light to dark grey, fine grained and massive sandstone. The sandstones are blocky to crumbly, dolomitic in some places and slightly glauconitic. Brownish discolouration is occasionally seen in the sandstone which could be due to the dolomite and iron-calcite cement. |                                                                                                                                                               |                          |
|                |         |           |                                                          |                                                                                                                                                                                |      |        |                                                                                                         |            | Fc     | Greyish-black mudstone                                                                                                                                                                                                                                                     |                                                                                                                                                               |                          |
|                |         |           |                                                          |                                                                                                                                                                                |      |        |                                                                                                         |            | Srl    | Light grey, very fine grained sandstone with stylolites and ripple laminations                                                                                                                                                                                             |                                                                                                                                                               |                          |
|                |         |           |                                                          |                                                                                                                                                                                |      |        |                                                                                                         |            |        | Black carbonaceous shale                                                                                                                                                                                                                                                   |                                                                                                                                                               |                          |
|                |         |           |                                                          |                                                                                                                                                                                |      |        |                                                                                                         |            | Smg    | Light grey, very fine grained massive sandstone. Cross bedding, stylolites, discolouration, shell fragments and sharp contact with the underlying shale                                                                                                                    |                                                                                                                                                               |                          |
|                |         |           |                                                          |                                                                                                                                                                                |      |        |                                                                                                         |            | Fl     | Black shale with siltstone laminae                                                                                                                                                                                                                                         |                                                                                                                                                               |                          |
|                |         |           |                                                          |                                                                                                                                                                                |      |        |                                                                                                         |            | Smg    | Light grey, very fine grained massive sandstone with shell fragments, concretions (dolomite) and occasional shale clast                                                                                                                                                    |                                                                                                                                                               |                          |
|                |         |           |                                                          |                                                                                                                                                                                |      |        |                                                                                                         |            |        | Mudstone with sandstone and siltstone laminae.                                                                                                                                                                                                                             |                                                                                                                                                               |                          |
| 2              |         |           |                                                          |                                                                                                                                                                                |      |        |                                                                                                         |            | 2547   |                                                                                                                                                                                                                                                                            |                                                                                                                                                               |                          |
|                |         | Sh, Fl    | Light grey, fine grained sandstone with mudstone laminae |                                                                                                                                                                                |      |        |                                                                                                         |            |        |                                                                                                                                                                                                                                                                            |                                                                                                                                                               |                          |
|                |         |           | Smg                                                      | Light grey, fine grained sandstone interbedded with mudstone and siltstone. The siltstone grades to sandstone. The sandstone has ripple laminations and small load structures. |      |        |                                                                                                         |            |        |                                                                                                                                                                                                                                                                            |                                                                                                                                                               |                          |
|                |         |           | Fc                                                       | Carbonaceous shale with trace fossils and bioturbated                                                                                                                          |      |        |                                                                                                         |            |        |                                                                                                                                                                                                                                                                            |                                                                                                                                                               |                          |
|                |         |           | Srl                                                      | Thinly interbedded sandstone and shale. The sandstone has ripple lamination, small scale load structures, trace fossils and carbonaceous fragments.                            |      |        |                                                                                                         |            |        |                                                                                                                                                                                                                                                                            |                                                                                                                                                               |                          |
|                |         |           | Sm                                                       | Massive sandstone with shelly fragments.                                                                                                                                       |      |        |                                                                                                         |            |        |                                                                                                                                                                                                                                                                            |                                                                                                                                                               |                          |
|                |         |           | Sm                                                       | Light grey massive sandstone interbedded with shale. The contacts between the sandstone and shale are sharp.                                                                   |      |        |                                                                                                         |            |        |                                                                                                                                                                                                                                                                            |                                                                                                                                                               |                          |
|                | 2555    |           |                                                          |                                                                                                                                                                                |      | Sm     | Dark grey massive sandstone interbedded with shale. The sandstone has flame structures and bioturbated. |            |        |                                                                                                                                                                                                                                                                            |                                                                                                                                                               |                          |

8



| BOREHOLE E-BB1 ( CORE 4 - 5) |         |           |           |      |      |        |        |                                                                          |            |        |            |             |                                                                                                                                                                                                   |
|------------------------------|---------|-----------|-----------|------|------|--------|--------|--------------------------------------------------------------------------|------------|--------|------------|-------------|---------------------------------------------------------------------------------------------------------------------------------------------------------------------------------------------------|
| CORE NO                      | HORIZON | DEPTH (m) | LITHOLOGY |      |      |        |        |                                                                          | PHOTOGRAPH | CYCLES | STRUCTURES | FACIES CODE | LITHOLOGICAL DESCRIPTION                                                                                                                                                                          |
|                              |         |           | MUD       |      | SAND |        |        |                                                                          |            |        |            |             |                                                                                                                                                                                                   |
|                              |         |           | CLAY      | SILT | FINE | MEDIUM | COARSE | CONGLOMERATE                                                             |            |        |            |             |                                                                                                                                                                                                   |
|                              |         |           |           |      |      |        |        |                                                                          |            |        |            |             |                                                                                                                                                                                                   |
| 4                            | 13A     | 2719      |           |      |      |        |        |                                                                          |            |        |            |             | Greyish, fine grained, massive sandstone. The sandstone is glauconitic, slightly carbonaceous with occasional shell fragments.                                                                    |
|                              |         | 2721      |           |      |      |        |        |                                                                          |            |        |            |             | Black shale interbedded with siltstone laminae                                                                                                                                                    |
|                              |         | 2723      |           |      |      |        |        |                                                                          |            |        |            |             | Greyish, fine grained, faintly laminated to massive sandstone with stylolite. The sandstone has faint horizontal bedding and the bedding is sometimes disturbed by loading.                       |
|                              |         | 2725      |           |      |      |        |        |                                                                          |            |        |            |             | Black shale interbedded with horizontally laminated glauconitic sandstone and siltstone. The sandstone shows fining upward sequence with a thin medium grained glauconitic sandstone at the base. |
|                              |         | 2725      |           |      |      |        |        |                                                                          |            |        |            |             | Core missing                                                                                                                                                                                      |
|                              |         | 2846      |           |      |      |        |        |                                                                          |            |        |            |             | Dark grey, medium grained massive sandstone with stylolite development.                                                                                                                           |
|                              | 2848    |           |           |      |      |        |        | Light grey, fine grained massive sandstone with slight inclined bedding. |            |        |            |             |                                                                                                                                                                                                   |
|                              | 2850    |           |           |      |      |        |        |                                                                          |            |        |            |             |                                                                                                                                                                                                   |
|                              | 2852    |           |           |      |      |        |        | Light grey, fine grained sandstone with faint horizontal bedding.        |            |        |            |             |                                                                                                                                                                                                   |
|                              |         | 2854      |           |      |      |        |        |                                                                          |            |        |            |             |                                                                                                                                                                                                   |

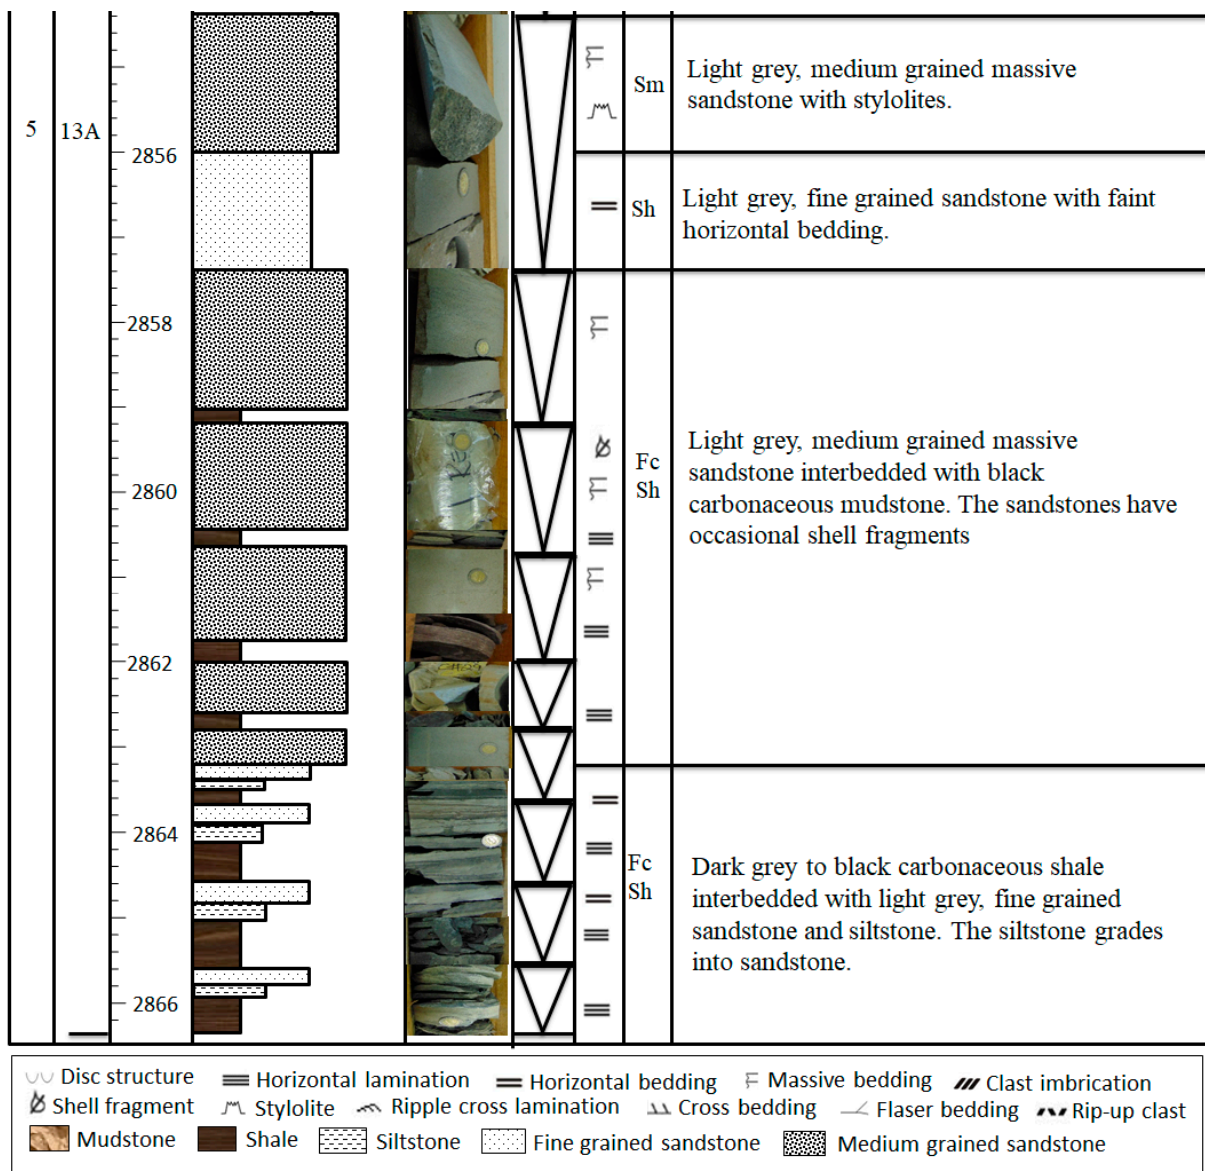

| BOREHOLE E-BB1 (CORE 6 - 8) |                                                                                     |           |                                                                                     |      |      |        |                                                                                     |                                                                                     |                                                                                     |                                                                                                            |                                                                                     |                                                                                     |                                                                                                                                                                             |                                                                                   |                                                                                                                                                                                                                                                                                            |                                                                                              |
|-----------------------------|-------------------------------------------------------------------------------------|-----------|-------------------------------------------------------------------------------------|------|------|--------|-------------------------------------------------------------------------------------|-------------------------------------------------------------------------------------|-------------------------------------------------------------------------------------|------------------------------------------------------------------------------------------------------------|-------------------------------------------------------------------------------------|-------------------------------------------------------------------------------------|-----------------------------------------------------------------------------------------------------------------------------------------------------------------------------|-----------------------------------------------------------------------------------|--------------------------------------------------------------------------------------------------------------------------------------------------------------------------------------------------------------------------------------------------------------------------------------------|----------------------------------------------------------------------------------------------|
| CORE NO                     | HORIZON                                                                             | DEPTH (m) | LITHOLOGY                                                                           |      |      |        |                                                                                     |                                                                                     | PHOTOGRAPH                                                                          | CYCLES                                                                                                     | STRUCTURES                                                                          | FACIES CODE                                                                         | LITHOLOGICAL DESCRIPTION                                                                                                                                                    |                                                                                   |                                                                                                                                                                                                                                                                                            |                                                                                              |
|                             |                                                                                     |           | MUD                                                                                 |      | SAND |        |                                                                                     |                                                                                     |                                                                                     |                                                                                                            |                                                                                     |                                                                                     |                                                                                                                                                                             |                                                                                   |                                                                                                                                                                                                                                                                                            |                                                                                              |
|                             |                                                                                     |           | CLAY                                                                                | SILT | FINE | MEDIUM | COARSE                                                                              | CONGLOMERATE                                                                        |                                                                                     |                                                                                                            |                                                                                     |                                                                                     |                                                                                                                                                                             |                                                                                   |                                                                                                                                                                                                                                                                                            |                                                                                              |
|                             |                                                                                     |           |                                                                                     |      |      |        |                                                                                     |                                                                                     |                                                                                     |                                                                                                            |                                                                                     |                                                                                     | Core missing                                                                                                                                                                |                                                                                   |                                                                                                                                                                                                                                                                                            |                                                                                              |
| 6                           | 13A                                                                                 | 2872      | 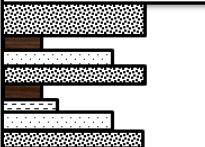   |      |      |        |                                                                                     |                                                                                     |    |                           |    | Sm<br>Fl                                                                            | Light to dark grey, fine to medium grained massive sandstone interbedded with greyish black shale and occasional siltstone. The sandstone bed grades upwards into mudstone. |                                                                                   |                                                                                                                                                                                                                                                                                            |                                                                                              |
|                             |                                                                                     | 2874      |    |      |      |        |                                                                                     |                                                                                     |                                                                                     |                                                                                                            |                                                                                     |                                                                                     |                                                                                            |  | Fc                                                                                                                                                                                                                                                                                         | Massive greyish-black carbonaceous mudstone. Pyrite is occasionally present in the mudstone. |
|                             |                                                                                     | 2876      |                                                                                     |      |      |        |                                                                                     |                                                                                     |                                                                                     |                                                                                                            |                                                                                     |                                                                                     |                                                                                                                                                                             |                                                                                   |                                                                                                                                                                                                                                                                                            |                                                                                              |
|                             |                                                                                     |           |                                                                                     |      |      |        |                                                                                     |                                                                                     |                                                                                     |                                                                                                            |                                                                                     |                                                                                     | Core missing                                                                                                                                                                |                                                                                   |                                                                                                                                                                                                                                                                                            |                                                                                              |
| 8                           | Pre -6A                                                                             | 3280      |  |      |      |        |                                                                                     |                                                                                     |  |                         |  | Sm<br>Fl                                                                            | Dark grey, fine grained, massive sandstone                                                                                                                                  |                                                                                   |                                                                                                                                                                                                                                                                                            |                                                                                              |
|                             |                                                                                     |           |                                                                                     |      |      |        |                                                                                     |                                                                                     |                                                                                     |                                                                                                            |                                                                                     |                                                                                     | Dark grey to greyish black carbonaceous shale with flaser bedded siltstone.                                                                                                 |                                                                                   |                                                                                                                                                                                                                                                                                            |                                                                                              |
|                             |                                                                                     | 3282      |  |      |      |        |                                                                                     |                                                                                     |                                                                                     |                                                                                                            |                                                                                     |  |                                                                                          | Sm<br>Sr                                                                          | Greyish, fine grained, massive to poorly stratified sandstone. Faint laminations are occasionally present.                                                                                                                                                                                 |                                                                                              |
|                             |                                                                                     |           |                                                                                     |      |      |        |                                                                                     |                                                                                     |                                                                                     |                                                                                                            |                                                                                     |                                                                                     |                                                                                                                                                                             |                                                                                   | Light grey, fine grained sandstone interlaminated with greyish to black siltstone. Horizontal and ripple laminations, flaser bedding and load structures are present in the sandstone and siltstone (in places).                                                                           |                                                                                              |
|                             |                                                                                     | 3284      |  |      |      |        |                                                                                     |                                                                                     |                                                                                     |                                                                                                            |                                                                                     |  |                                                                                          | Sh<br>Fl                                                                          | Greyish, medium grained, faintly laminated sandstone                                                                                                                                                                                                                                       |                                                                                              |
|                             |                                                                                     |           |                                                                                     |      |      |        |                                                                                     |                                                                                     |                                                                                     |                                                                                                            |                                                                                     |                                                                                     |                                                                                                                                                                             |                                                                                   | Light grey, fine grained sandstone interlaminated with greyish to black mudstone and siltstone.                                                                                                                                                                                            |                                                                                              |
|                             |                                                                                     | 3286      |  |      |      |        |                                                                                     |                                                                                     |                                                                                     |                                                                                                            |                                                                                     |  |                                                                                          |                                                                                   | Dark grey, fine grained, sandstone interbedded with siltstone and dark grey to greyish black shale. The sedimentary structures in the sandstones and siltstones are ripple, horizontal and planar laminations, convolute and flaser beddings. The sandstone bed grades upwards into shale. |                                                                                              |
|                             |                                                                                     |           |                                                                                     |      |      |        |                                                                                     |                                                                                     |                                                                                     |                                                                                                            |                                                                                     |                                                                                     |                                                                                                                                                                             |                                                                                   |                                                                                                                                                                                                                                                                                            |                                                                                              |
|                             |                                                                                     | 3288      |  |      |      |        |                                                                                     |                                                                                     |                                                                                     |                                                                                                            |                                                                                     |  |                                                                                          | Sh<br>Fc                                                                          | Greyish-black, fine grained, faintly laminated sandstone                                                                                                                                                                                                                                   |                                                                                              |
|                             |                                                                                     |           |                                                                                     |      |      |        |                                                                                     |                                                                                     |                                                                                     |                                                                                                            |                                                                                     |                                                                                     |                                                                                                                                                                             |                                                                                   | Light grey, fine grained sandstone interlaminated with greyish-black siltstone. The siltstone is carbonaceous.                                                                                                                                                                             |                                                                                              |
| 3290                        |  |           |                                                                                     |      |      |        |  |  | Sm<br>Sh                                                                            | Greyish, fine grained, massive to poorly stratified sandstone. Faint laminations are occasionally present. |                                                                                     |                                                                                     |                                                                                                                                                                             |                                                                                   |                                                                                                                                                                                                                                                                                            |                                                                                              |
|                             |                                                                                     |           |                                                                                     |      |      |        |                                                                                     |                                                                                     |                                                                                     |                                                                                                            |                                                                                     |                                                                                     |                                                                                                                                                                             |                                                                                   |                                                                                                                                                                                                                                                                                            |                                                                                              |

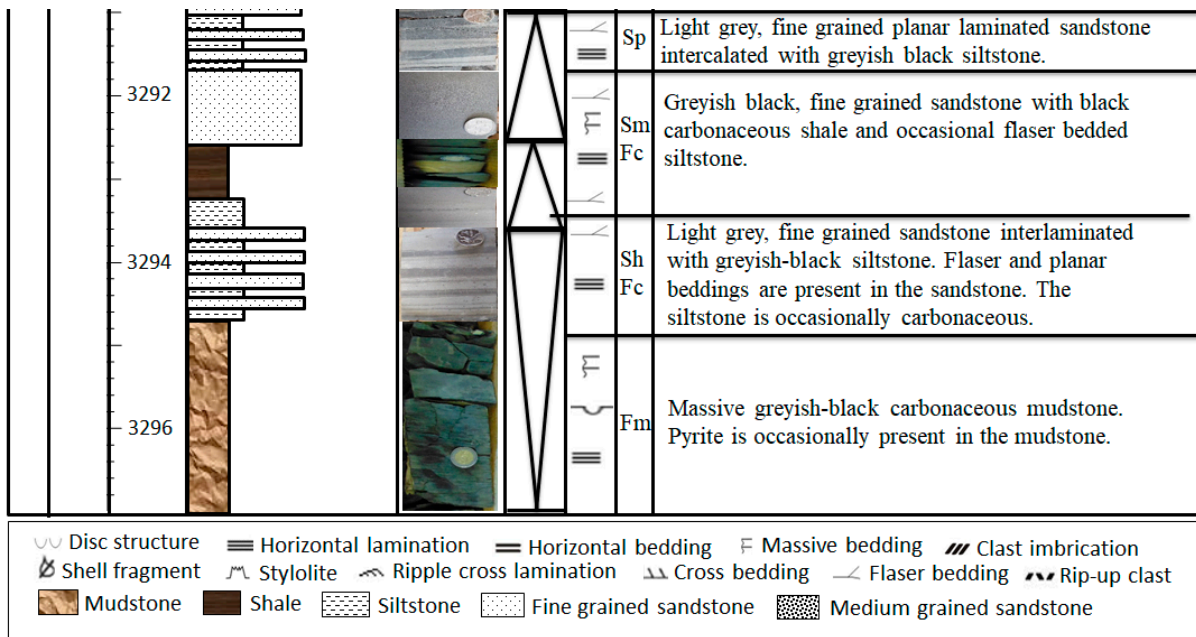

| BOREHOLE E-BB1 |         |           |                                                                                   |      |                                                                                     |        |              |                                                                                    |                                                                                    |                                                                                   |                                                                                     |                                                                                                                                                                                                                                                                     |                                                                                     |     |                                                                                                                                                                                                                                        |  |  |
|----------------|---------|-----------|-----------------------------------------------------------------------------------|------|-------------------------------------------------------------------------------------|--------|--------------|------------------------------------------------------------------------------------|------------------------------------------------------------------------------------|-----------------------------------------------------------------------------------|-------------------------------------------------------------------------------------|---------------------------------------------------------------------------------------------------------------------------------------------------------------------------------------------------------------------------------------------------------------------|-------------------------------------------------------------------------------------|-----|----------------------------------------------------------------------------------------------------------------------------------------------------------------------------------------------------------------------------------------|--|--|
| CORE NO        | HORIZON | DEPTH (m) | LITHOLOGY                                                                         |      |                                                                                     |        |              | PHOTOGRAPH                                                                         | CYCLCES                                                                            | STRUCTURES                                                                        | FACIES CODE                                                                         | LITHOLOGICAL DESCRIPTION                                                                                                                                                                                                                                            |                                                                                     |     |                                                                                                                                                                                                                                        |  |  |
|                |         |           | MUD                                                                               |      | SAND                                                                                |        |              |                                                                                    |                                                                                    |                                                                                   |                                                                                     |                                                                                                                                                                                                                                                                     |                                                                                     |     |                                                                                                                                                                                                                                        |  |  |
|                |         |           | CLAY                                                                              | SILT | FINE                                                                                | MEDIUM | COARSE       |                                                                                    |                                                                                    |                                                                                   |                                                                                     |                                                                                                                                                                                                                                                                     |                                                                                     |     |                                                                                                                                                                                                                                        |  |  |
| 1              | F to C  | 3260      |  |      |                                                                                     |        |              |  |  |  | Sm                                                                                  | Light to dark grey, fine grained massive sandstone.                                                                                                                                                                                                                 |                                                                                     |     |                                                                                                                                                                                                                                        |  |  |
|                |         | 3262      |  |      |                                                                                     |        |              |                                                                                    |                                                                                    |                                                                                   | Smg<br>Srl<br>Fl                                                                    | Dark grey, fine grained ripple laminated to massive glauconitic sandstone interbedded with greyish-black distorted shale and occasionally siltstone. Convolute and cross beddings are present in the sandstones, especially where the sandstones are thinly bedded. |                                                                                     |     |                                                                                                                                                                                                                                        |  |  |
|                |         | 3264      |  |      |                                                                                     |        |              |                                                                                    |                                                                                    |                                                                                   |                                                                                     |                                                                                                                                                                                                                                                                     |                                                                                     |     |                                                                                                                                                                                                                                        |  |  |
|                |         | 3266      |  |      |                                                                                     |        |              |                                                                                    |                                                                                    |                                                                                   | Smg<br>Fl                                                                           |                                                                                                                                                                                                                                                                     |                                                                                     |     |                                                                                                                                                                                                                                        |  |  |
|                |         | 3268      |  |      |                                                                                     |        |              |                                                                                    |                                                                                    |                                                                                   | Smg                                                                                 | Greyish-black, fine grained massive glauconitic sandstone.                                                                                                                                                                                                          |                                                                                     |     |                                                                                                                                                                                                                                        |  |  |
|                |         | 3270      |  |      |                                                                                     |        |              |                                                                                    |                                                                                    |                                                                                   | Smg<br>Fl                                                                           | Light grey, fine grained ripple laminated glauconitic sandstone interbedded with greyish-black shale.                                                                                                                                                               |                                                                                     |     |                                                                                                                                                                                                                                        |  |  |
|                |         |           |                                                                                   |      |                                                                                     |        |              |                                                                                    |                                                                                    |                                                                                   |                                                                                     | Core missing                                                                                                                                                                                                                                                        |                                                                                     |     |                                                                                                                                                                                                                                        |  |  |
|                |         |           |                                                                                   |      |                                                                                     |        |              |                                                                                    |                                                                                    |                                                                                   |                                                                                     |                                                                                                                                                                                                                                                                     |                                                                                     |     |                                                                                                                                                                                                                                        |  |  |
|                |         | 2         | F to C                                                                            | 3526 |  |        |              |                                                                                    |                                                                                    |                                                                                   |  |                                                                                                                                                                                  |  | Smg | Light grey, fine grained and massive glauconitic sandstone interbedded with mudstone and siltstone. The sandstone sometime has shale clast. The siltstone grades to sandstone. The contacts between the sandstone and shale are sharp. |  |  |
|                |         |           |                                                                                   | 3528 |  |        |              |                                                                                    |                                                                                    |                                                                                   |                                                                                     |                                                                                                                                                                                                                                                                     |                                                                                     | Fl  |                                                                                                                                                                                                                                        |  |  |
|                |         |           |                                                                                   | 3530 |  |        |              |                                                                                    |                                                                                    |                                                                                   |                                                                                     |                                                                                                                                                                                                                                                                     |                                                                                     |     |                                                                                                                                                                                                                                        |  |  |
|                |         |           |                                                                                   |      |                                                                                     |        | Core missing |                                                                                    |                                                                                    |                                                                                   |                                                                                     |                                                                                                                                                                                                                                                                     |                                                                                     |     |                                                                                                                                                                                                                                        |  |  |



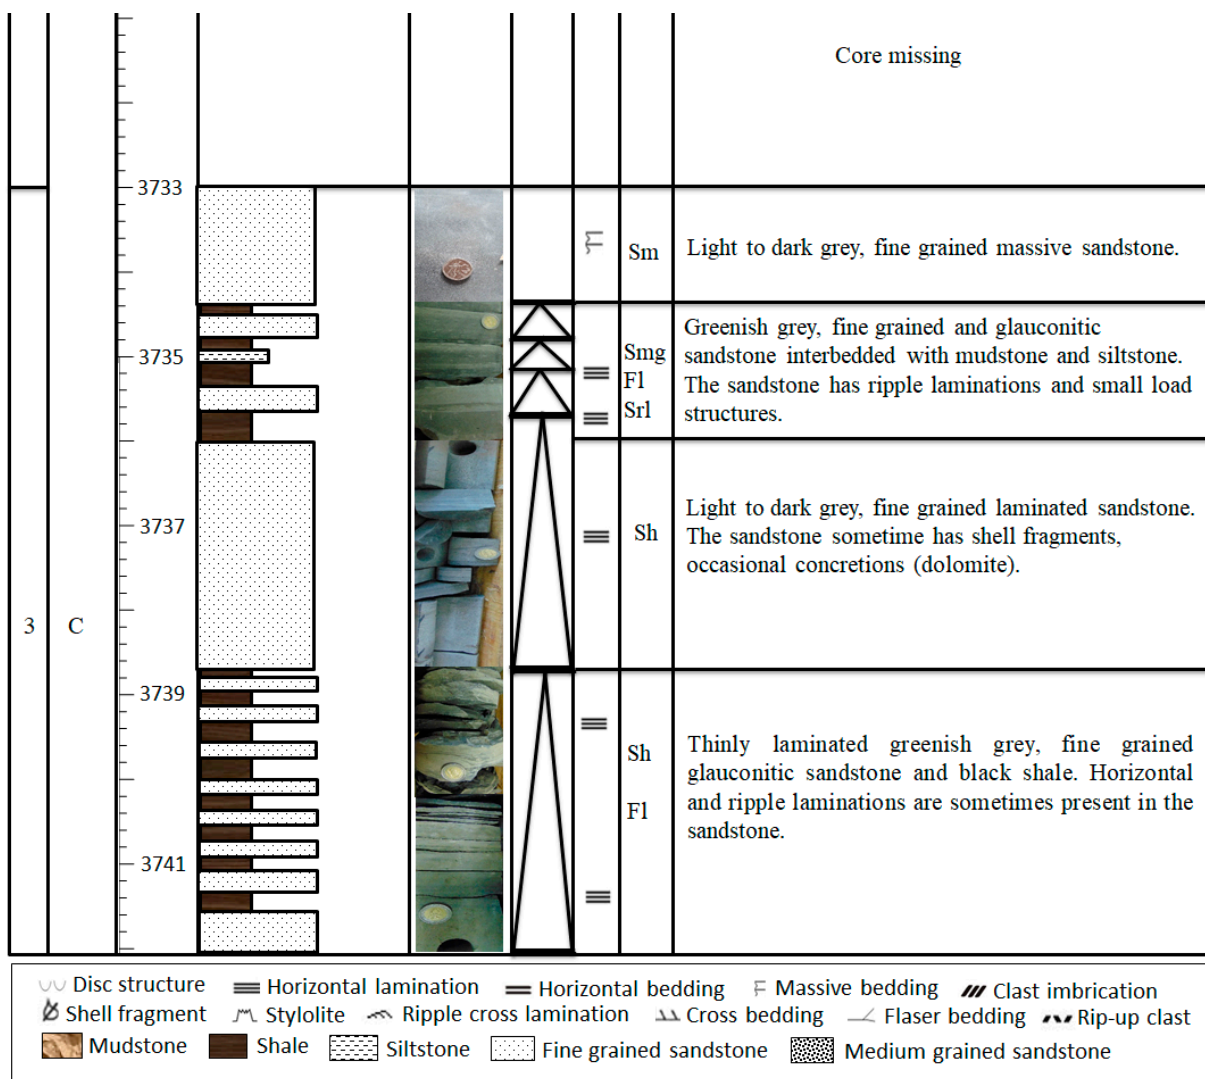

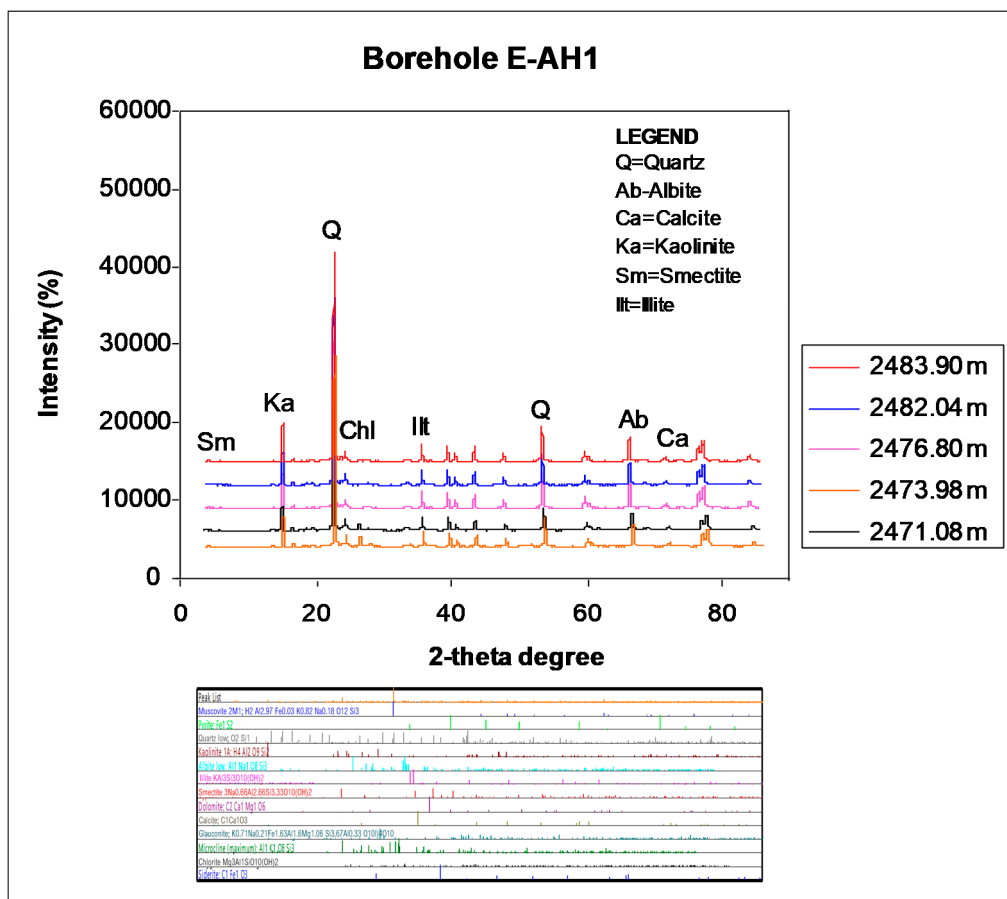

XRD pattern for Borehole E-AH1.

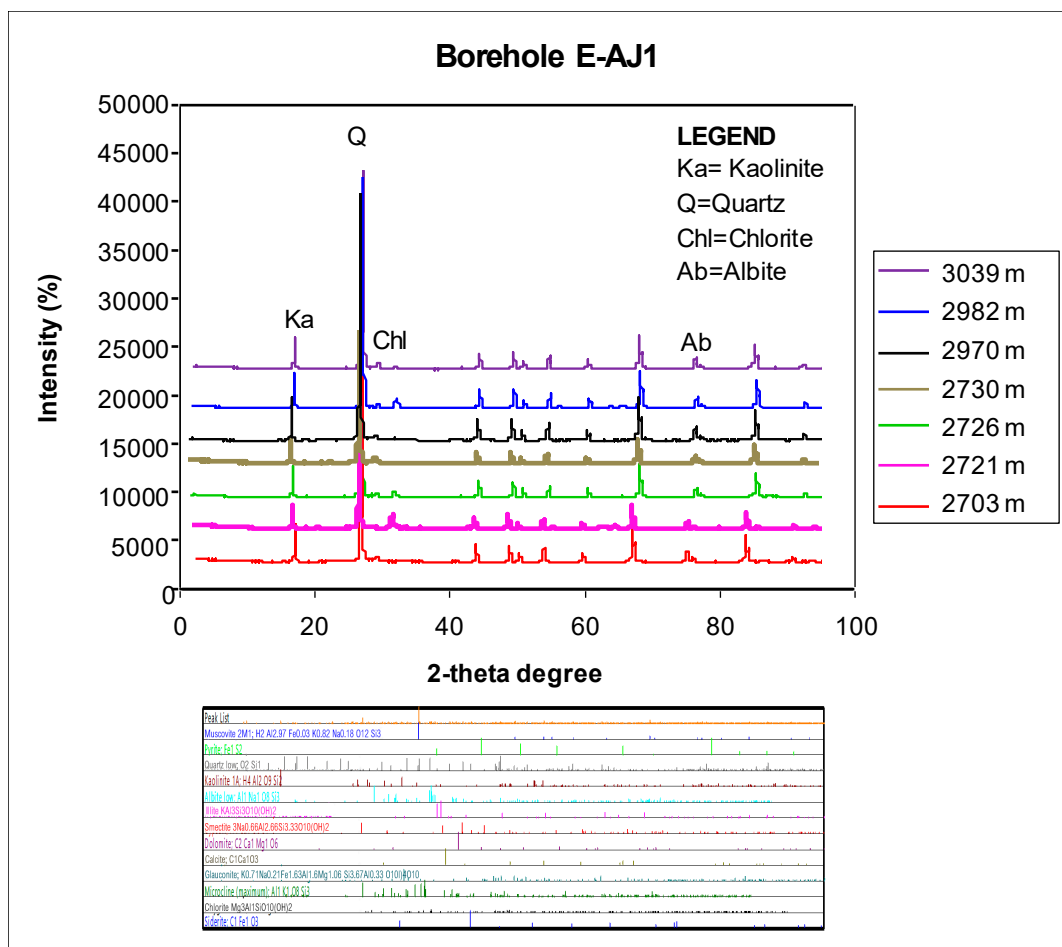

XRD pattern for Borehole E-AJ1.

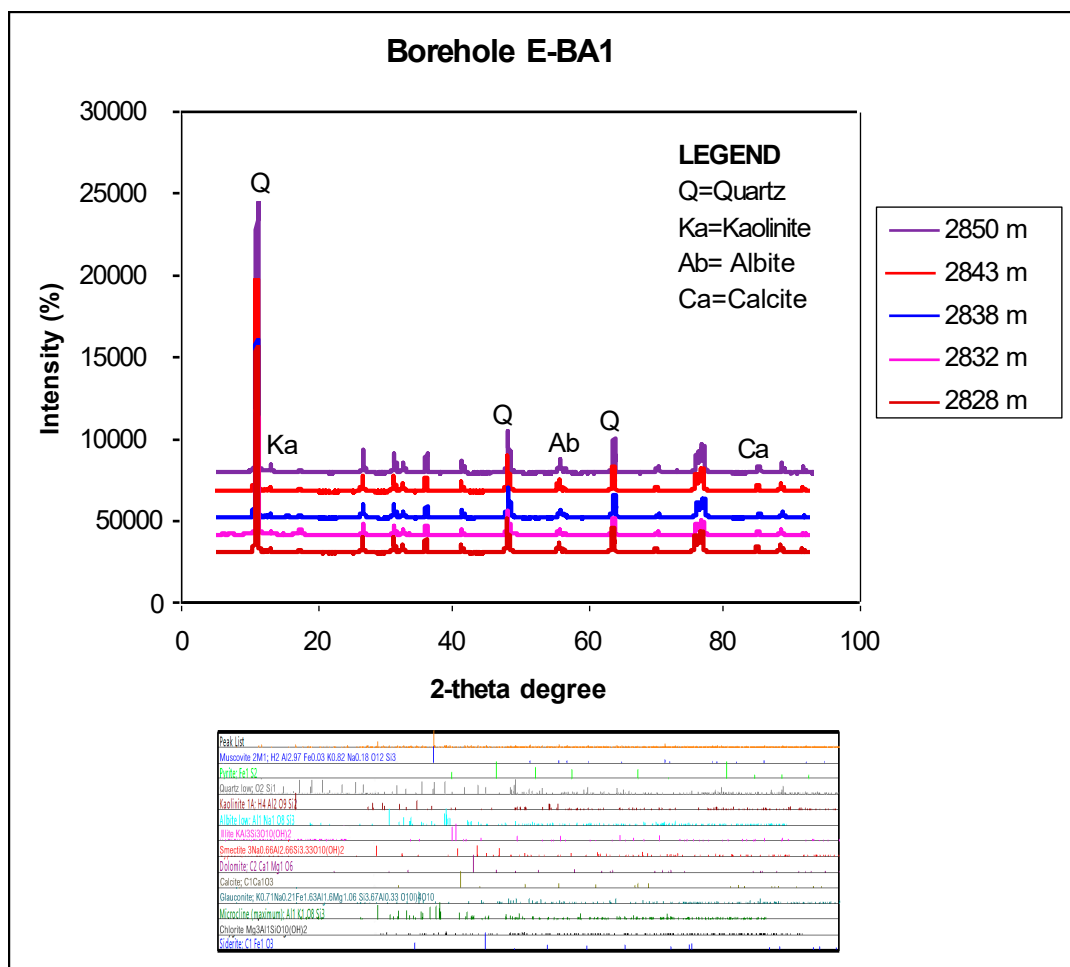

XRD pattern for Borehole E-BA1.

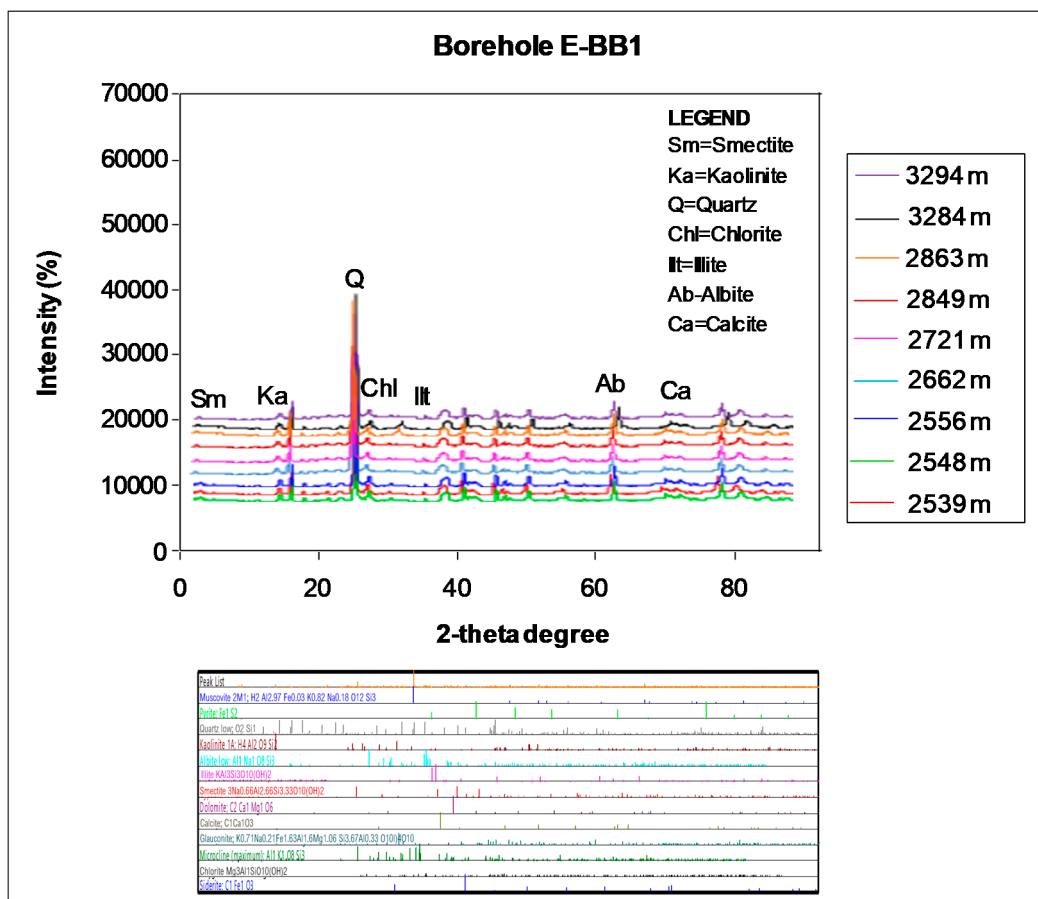

XRD pattern for Borehole E-BB1.



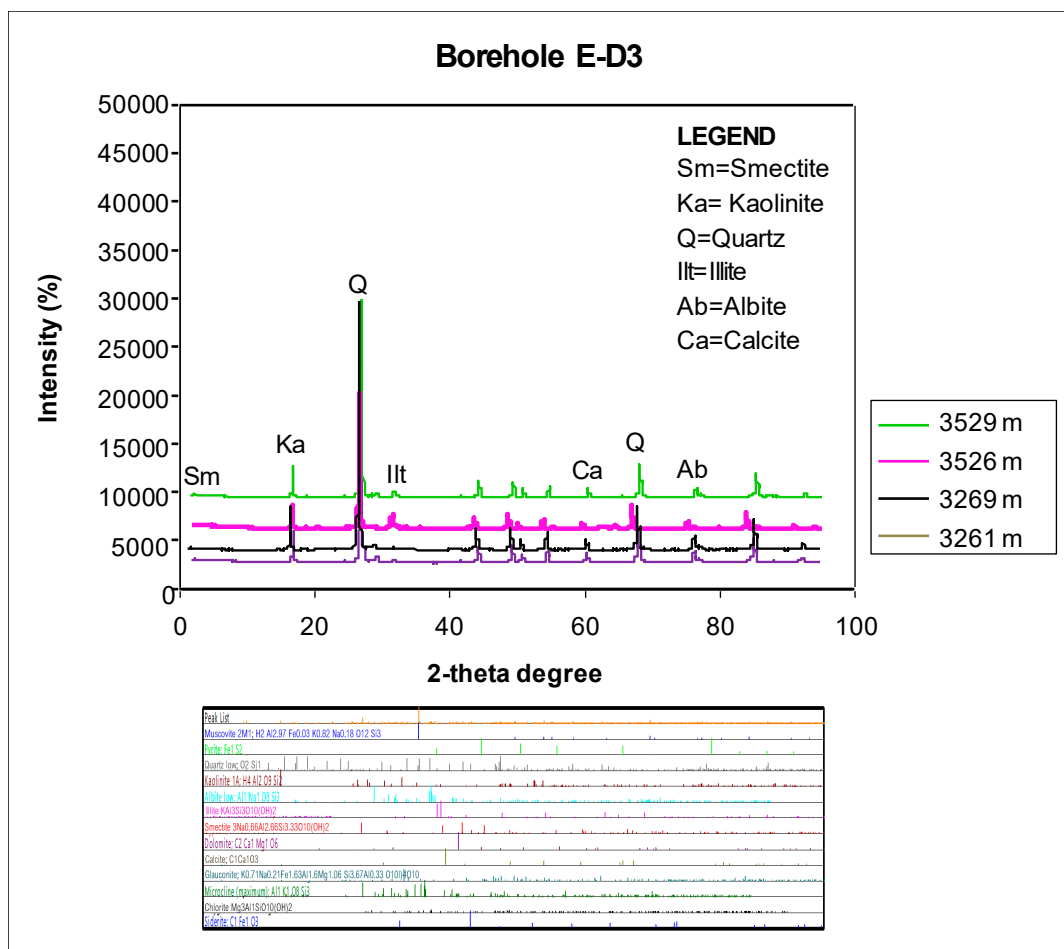

XRD pattern for Borehole E-D3.
